# Supplementary material
Source: PubMed Central journal article supplement (PMC9297746)
Supplement: NIHMS1810445-supplement-1.pdf [file NIHMS1810445-supplement-1.pdf]

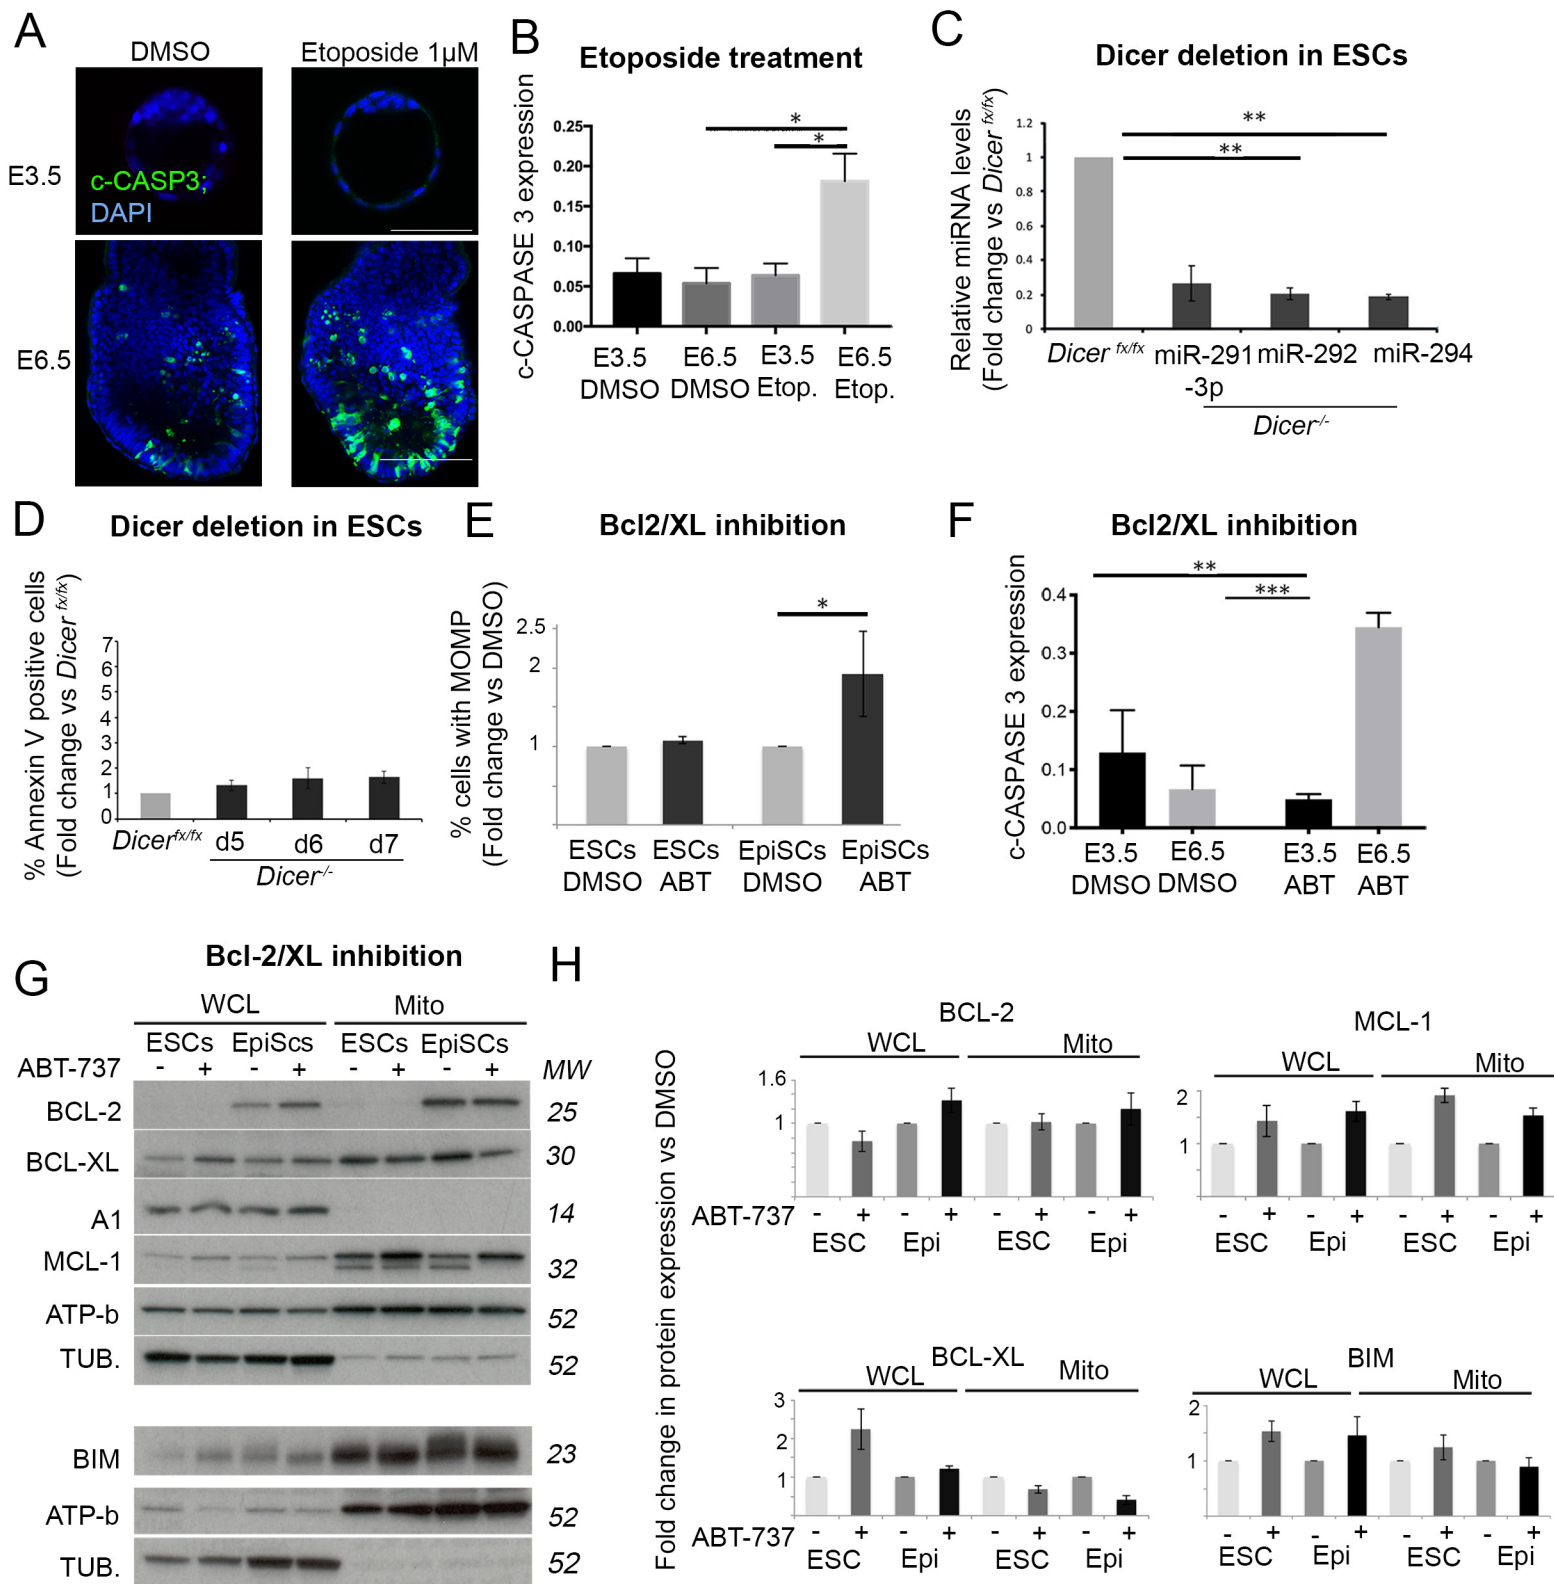

**Supplementary Figure 1. Enhanced sensitivity to apoptosis in primed pluripotent stem cells.** Related to Figure 1, Figure 2 and Figure 3. **A.** Levels of apoptosis as measured by cleaved-CASPASE 3 in E3.5 and E6.5 embryos cultured for 1.5h in the presence of DMSO or 1µM Etoposide. Scale bar E3.5=30 µm; E6.5=100µm. **B.** Quantification of cleaved-CASPASE 3 staining in A. DMSO: E3.5 (n= 3); E6.5 (n=4); 1µM Etoposide: E3.5 (n= 6); E6.5 (n=10). **C.** Quantitative RT-PCR showing change in miRNA relative expression 6 days after *Dicer* deletion in ESCs. Expression normalised against sno135. Fold change vs un-deleted cells is shown. **D.** Change in % of Annexin V positive ESCs at different time points after *Dicer* deletion relative to un-deleted cells. **E.** Change in % of ESCs and EpiSCs with loss of mitochondrial membrane potential (MOMP) after 24h treatment with 5µM ABT-737, relative to DMSO treated cells. **F.** Cleaved-CASPASE 3 levels in E3.5 and E6.5 embryos treated with DMSO or 2µM ABT-737 for 1.5h. E3.5 DMSO (n=5), ABT (n=5); E6.5 DMSO (n=6) ABT (n=6). Quantification of immunofluorescence images seen in Figure 2C. **G.** Levels of anti-apoptotic factors and BIM in whole cell extracts and mitochondrial extracts from ESCs and EpiSCs treated with DMSO or 5µM ABT-737 for 24h. A representative western blot is shown. **H.** Levels of anti-apoptotic proteins and BIM in whole cell and mitochondrial extracts from ESCs and EpiSC (Epi)s treated with DMSO or 5µM ABT-737 for 24h. Protein level is normalised against α-TUBULIN (TUB.) in whole cell extracts and against ATP-b in mitochondrial extracts. Fold change of ABT versus DMSO treated is shown. Average of a minimum of (B,F) 3, (D,H) 4 or (E) 5 experiments +/- SEM is shown. 2-way ANOVA with a Turkey correction (B, F); t-test1 tail unequal variance (C); t-test 2 tails unequal variance (D,E). \*p<0.05, \*\*p<0.01 or \*\*\*p<0.001. Where no significance is indicated it is because no statistically significant difference was observed. MW= Molecular weight.

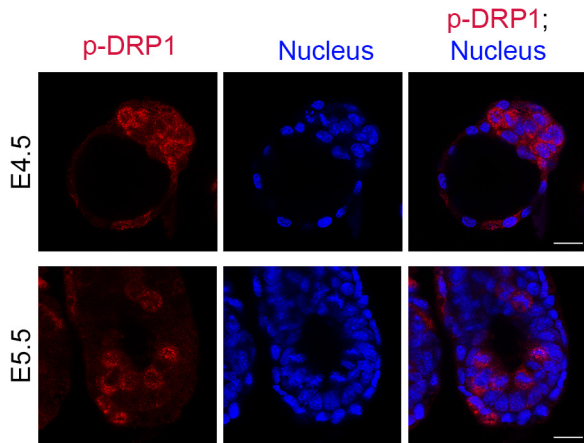

**Supplementary Figure 2. pDRP1 expression in E4.5 and E5.5 embryos.**  
 Related to Figure 4. pDRP1 immunostaining in E4.5 and E5.5 mouse embryos.  
 Scale bar=50  $\mu$ m.

A

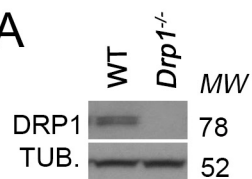

B

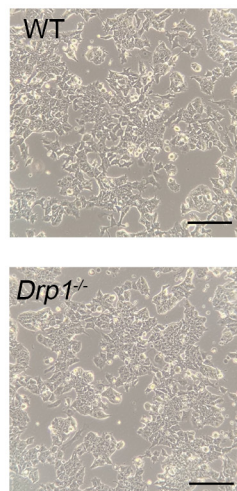

C

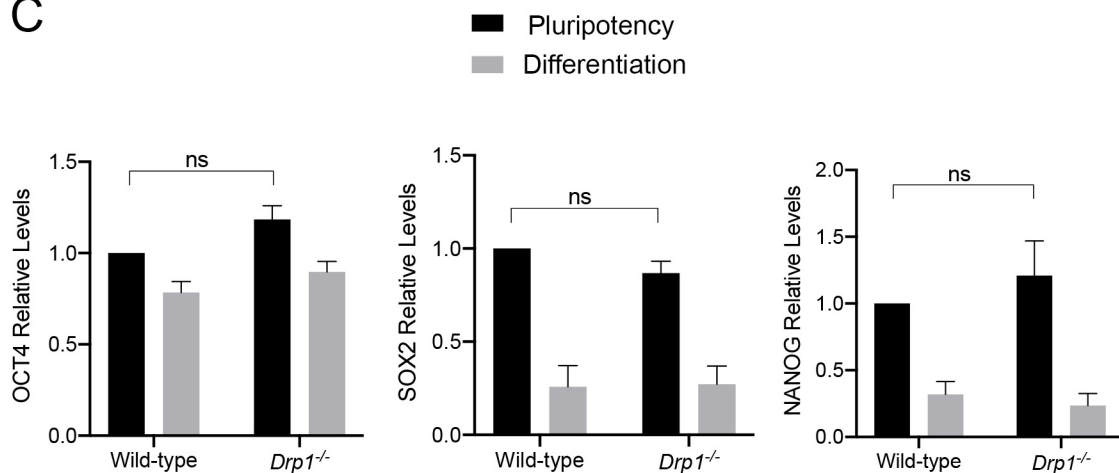

D

## Glycolysis in pluripotency

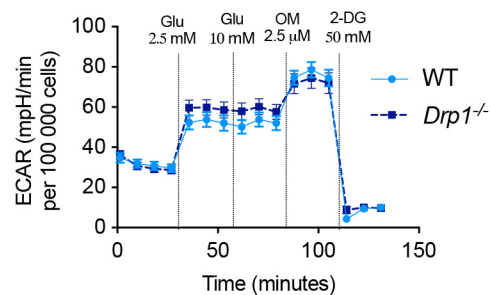

E

## Glycolysis specific parameters

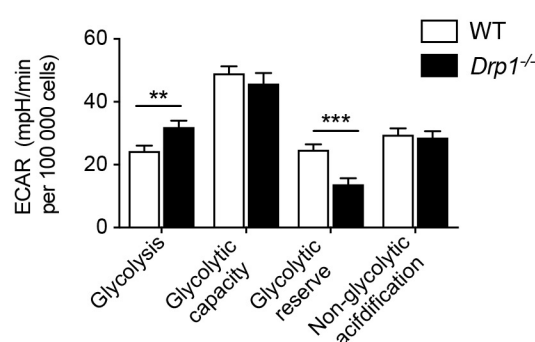

F

## OXPHOS pluripotency

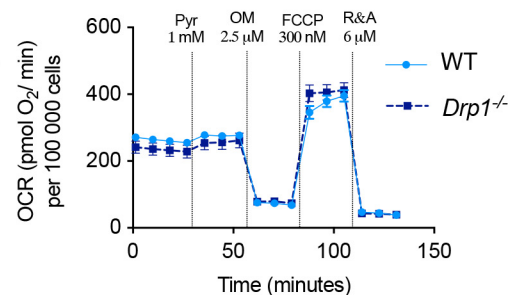

G

## OXPHOS specific parameters

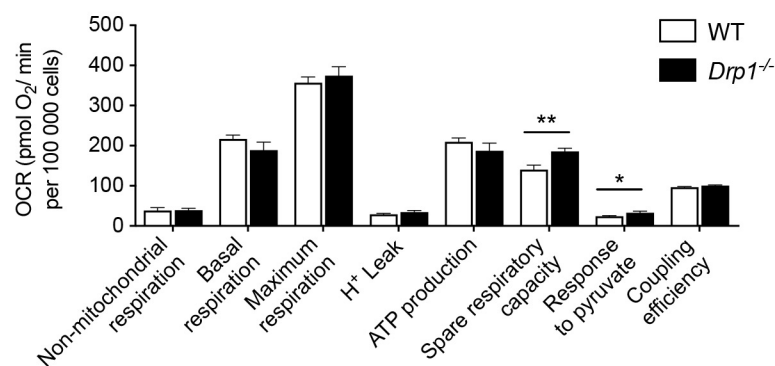

H

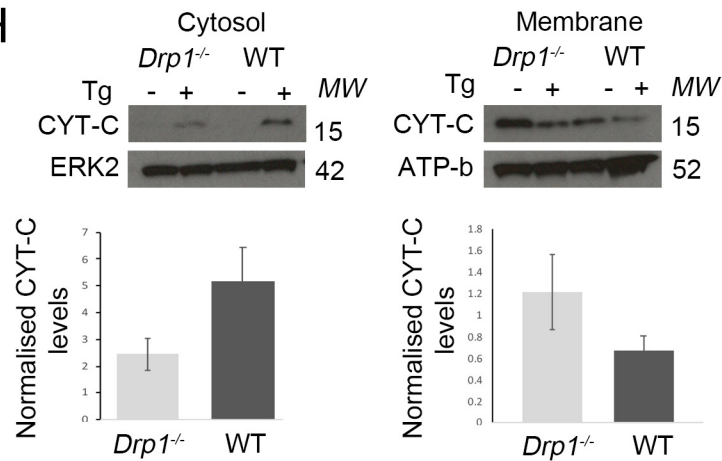

**Supplementary Figure 3. Metabolic profile of wild-type and *Drp1*<sup>-/-</sup> ESCs.** Related to Figure 5. **A.** Total DRP1 protein levels in wild type (WT) and *Drp1*<sup>-/-</sup> ESCs. **B.** Brightfield microscopy images showing WT and *Drp1*<sup>-/-</sup> ESCs morphology in pluripotency culture conditions. Scale bar=100  $\mu$ m. **C.** Quantification of the western blots shown in Figure 5C. **D.** Extracellular acidification rate (ECAR) during the glycolysis stress test. **E.** Metabolic parameters assessed during a glycolysis stress test. **F.** Oxygen consumption rate (OCR) during the mitochondria stress test. **G.** Metabolic parameters assessed after the mitochondria stress test. **H.** CYTOCHROME C (CYT-C) protein levels in cytosolic and membrane fractions of wild-type and *Drp1*<sup>-/-</sup> ESCs un-treated or treated with 1 $\mu$ M thapsigargin (Tg) for 6h. Graph shows cytochrome C protein levels normalised against ERK1/2 (cytosolic fraction) or ATP-b (membrane fraction) after thapsigargin treatment. Average of 3 independent experiments +/- SEM is shown. Statistical analysis was done with a (C,E) Mann Whitney test \*p<0.05, \*\*p<0.01 or \*\*\*p<0.001. Scale bar in B=100 $\mu$ m. MW= Molecular weight.

A

## DRP1

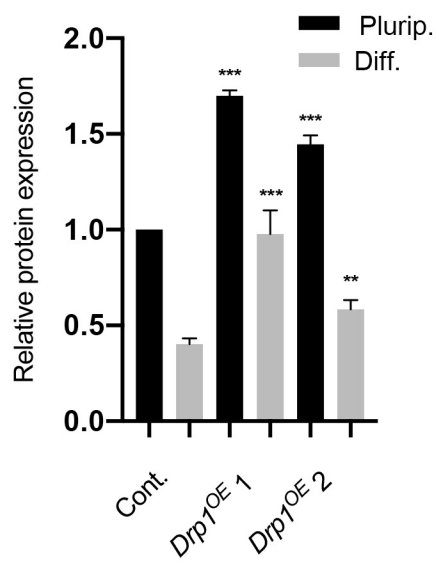

B

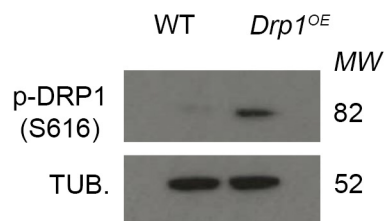

C

## p-DRP1 (S616)

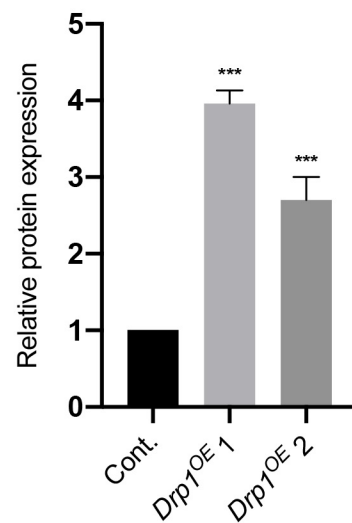

D

## ER Stress

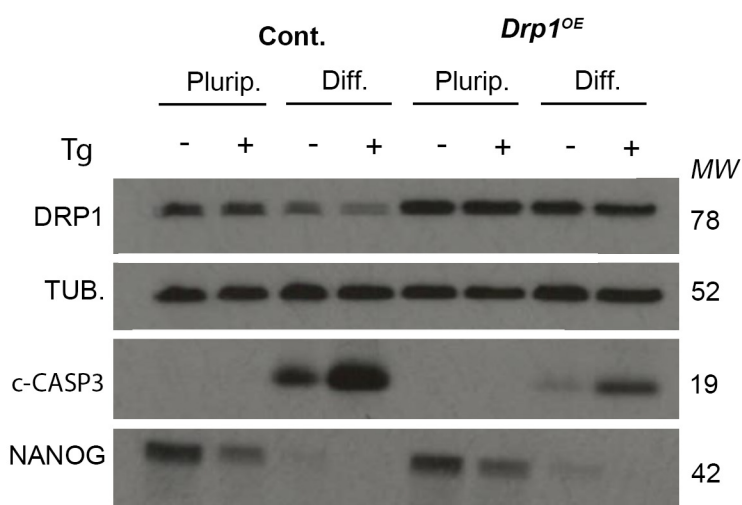

E

## NANOG

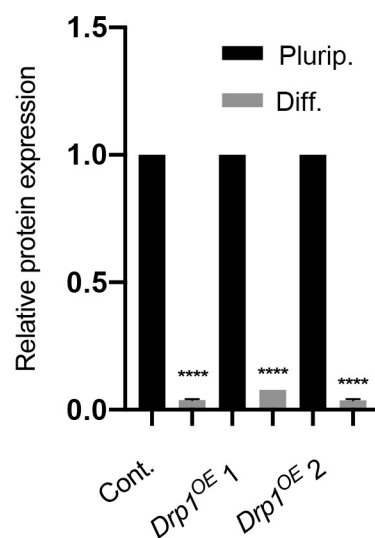

F

## Oxidative stress

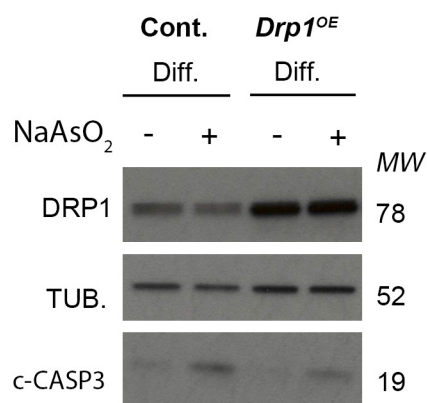

G

## BCL2/XL inhibition

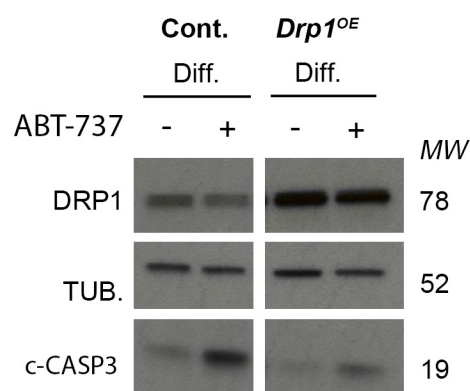

**Supplementary Figure 4. Characterization of *Drp1* over-expressing cells.** Related to Figure 6. **A.** Quantification of total DRP1 protein levels in wild-type (Cont.) and *Drp1*<sup>-/-</sup> ESCs cultured in pluripotency (Plurip.) or differentiation (Diff.) conditions. Protein levels are normalised against  $\alpha$ -TUBULIN (TUB.) and the graph shows expression levels relative to wild-type cells quantified from Supplementary Figure 4D. **B.** Levels of phospho-DRP1 (S616) in wild-type and *Drp1*<sup>OE</sup> cells in pluripotency or differentiation culture conditions detected by western blot. **C.** Quantification of (B). Protein levels are normalised against  $\alpha$ TUBULIN and the graph shows protein expression levels relative to wild-type cells. **D.** Total DRP1, cleaved-CASPASE 3 (c-CASP3),  $\alpha$ -TUBULIN (TUB.) and NANOG protein levels in wild-type and *Drp1*<sup>OE</sup> ESCs in pluripotency or differentiation culture conditions untreated or treated with 1 $\mu$ M thapsigargin (Tg) for 5h. **E.** NANOG protein levels in wild-type and *Drp1*<sup>OE</sup> ESCs in pluripotency or differentiation culture conditions. Protein levels are normalised against  $\alpha$ -TUBULIN and graph shows differentiation expression levels relative to ESCs for each cell type. **F.** Total DRP1, cleaved-CASPASE 3 and  $\alpha$ -TUBULIN protein levels in wild-type and *Drp1*<sup>OE</sup> in differentiation culture conditions untreated or treated with 1 $\mu$ M sodium arsenate (NaAsO<sub>2</sub>) for 5h. **G.** Total DRP1, cleaved-CASPASE 3 and  $\alpha$ -TUBULIN protein levels in wild-type and *Drp1*<sup>OE</sup> in differentiation culture conditions untreated or treated with 1 $\mu$ M ABT-737 for 4h. Average of 3 (C and E) or 5 (A) independent experiments +/- SEM is shown. Statistical comparisons are made to the control cells in the same culture condition (A and C) or compares a cell line in ESC and differentiation culture conditions for  $\epsilon$ . Students T-Test \*\*p<0.01, \*\*\*p<0.001, \*\*\*\*p<0.0001. In A, C and E *Drp1*<sup>OE</sup> 1 and 2 represent two independent *Drp1*<sup>OE</sup> lines. MW= Molecular weight.

**A**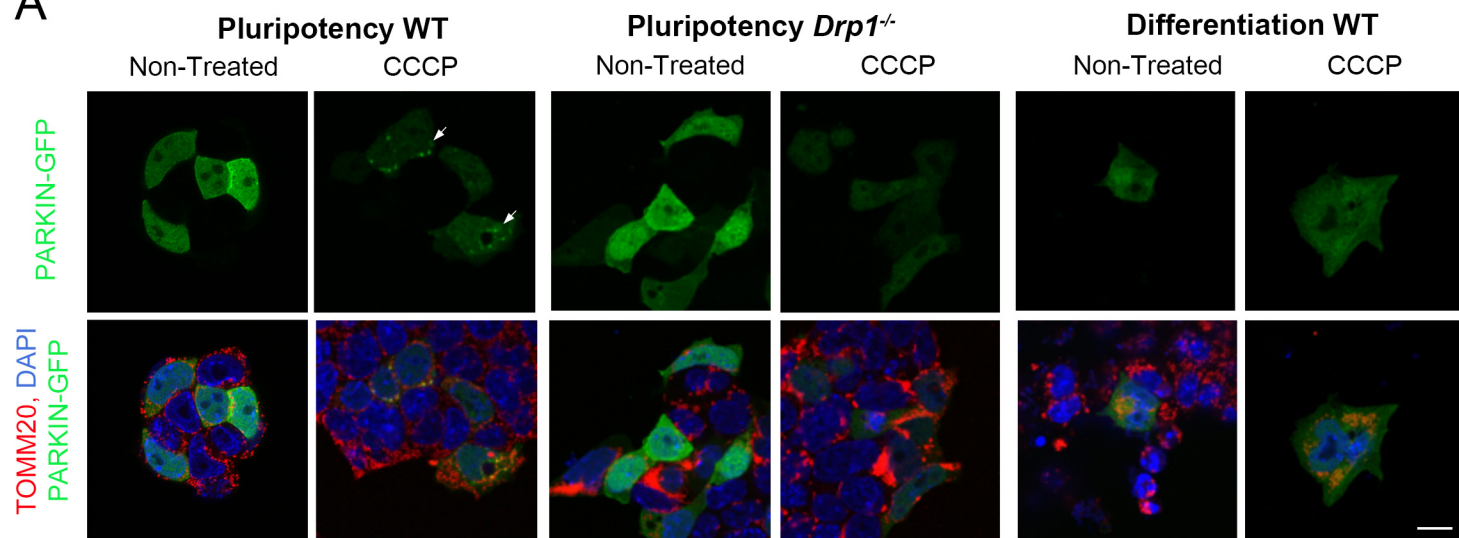**B**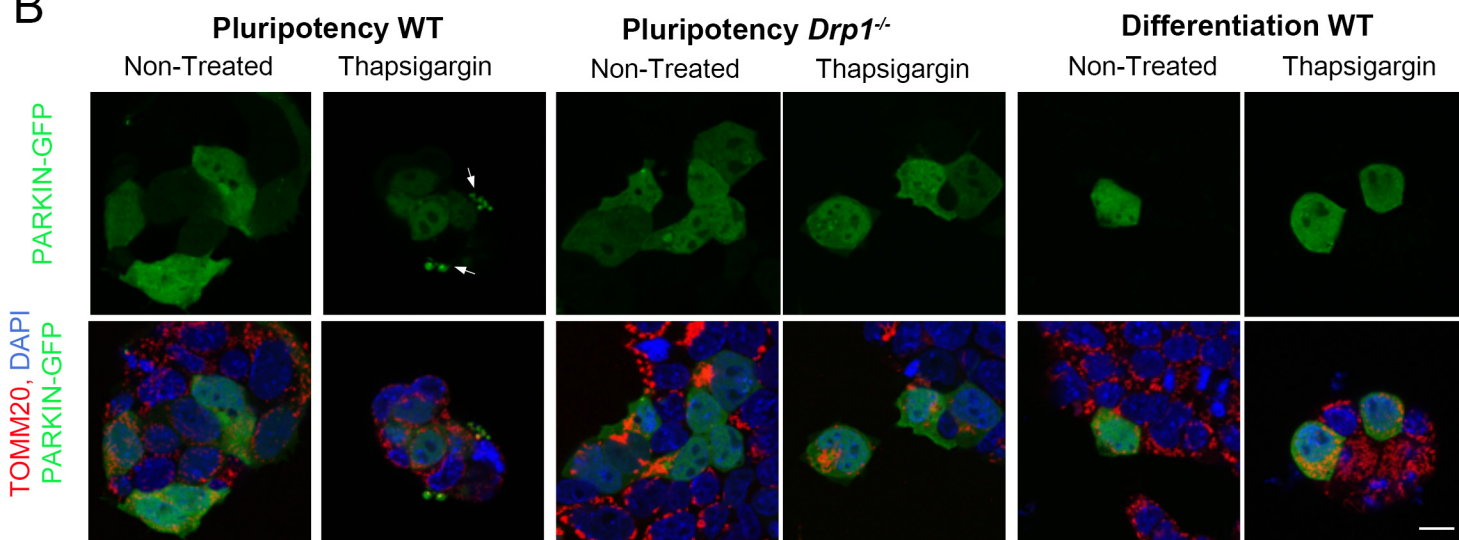**C**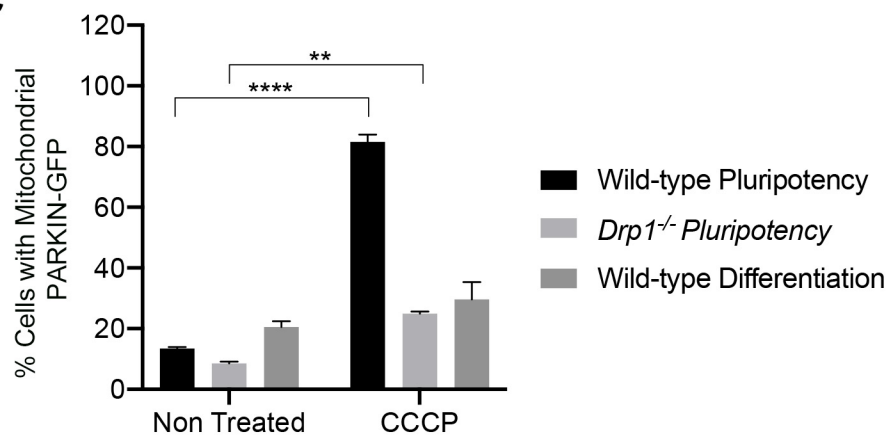**D**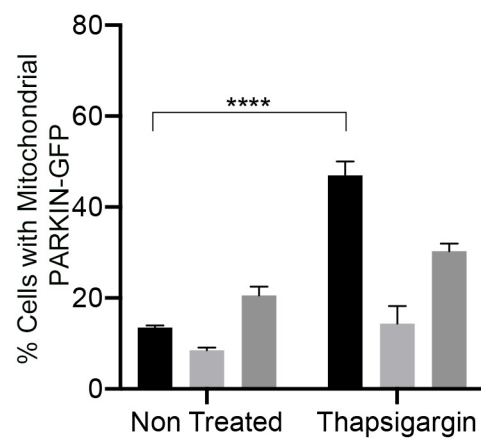

**Supplementary Figure 5. DRP1 regulates PARKIN localization in pluripotent stem cells.**

Related to Figure 7. **A.** TOMM20 immunostaining and GFP-PARKIN expression showing mitochondrial PARKIN localization in wild-type (WT) and *Drp1* mutant cells cultured in pluripotency culture conditions and wild-type cells cultured in differentiation conditions. Cells were then left untreated or treated with CCCP for 3 hours. White arrows indicate GFP-PARKIN aggregated appearing after drug treatment in control un-differentiated ESCs. **B.** TOMM20 immunostaining and GFP-PARKIN expression showing mitochondrial PARKIN localization in wild-type and *Drp1* mutant cells cultured in pluripotency culture conditions and wild-type cells cultured in differentiation conditions. Cells were then left untreated or treated with 1 $\mu$ M thapsigargin (Tg) for 5h. White arrows indicate GFP-PARKIN aggregated appearing after drug treatment on control un-differentiated ESCs. **C.** Quantification of GFP-PARKIN and TOMM20 co-localization from in images from (A). **D.** Quantification of GFP-PARKIN and TOMM20 co-localization from in images from (B). Average of 3 independent experiments +/- SEM is shown. 2-way ANOVA with Šidák correction \*\* $p < 0.01$ , \*\*\* $p < 0.001$  or \*\*\*\* $p < 0.0001$ . The statistical comparisons are made to untreated cells. Where no significance is indicated it is because no statistically significant difference was observed. Scale bar in A and B=10 $\mu$ m.

**A**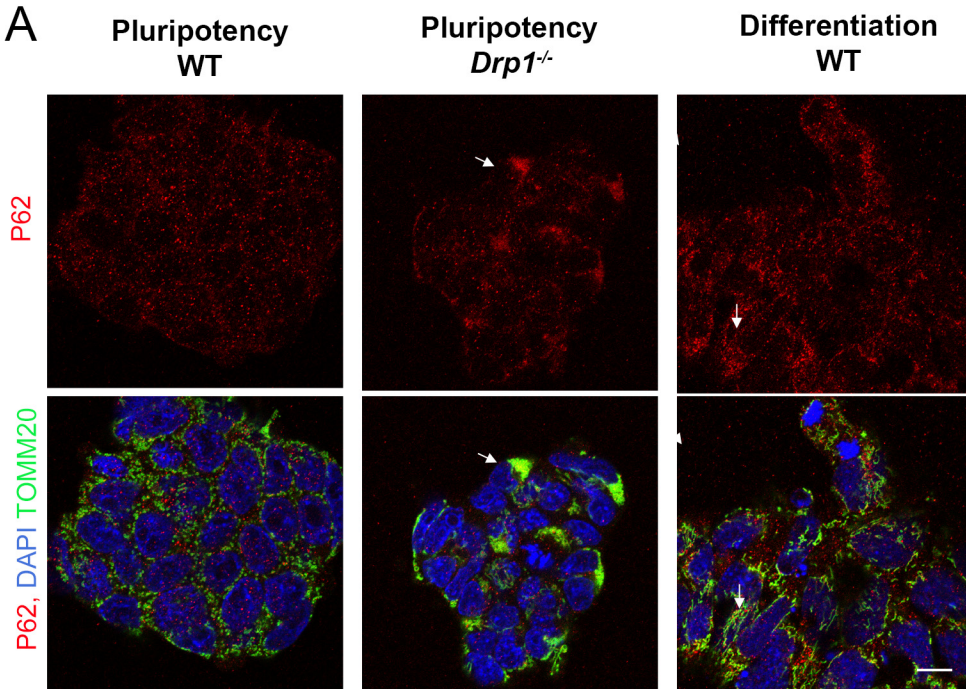**B**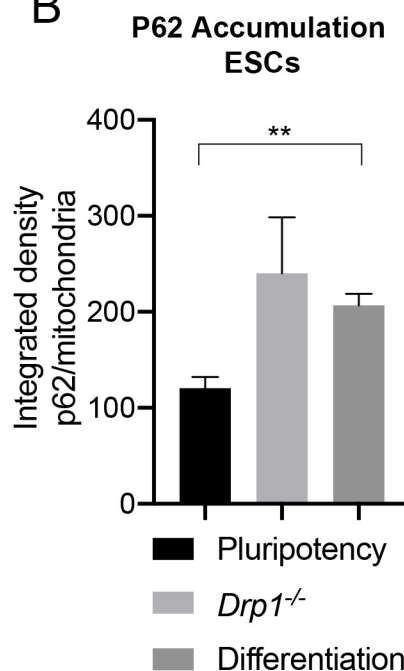**C**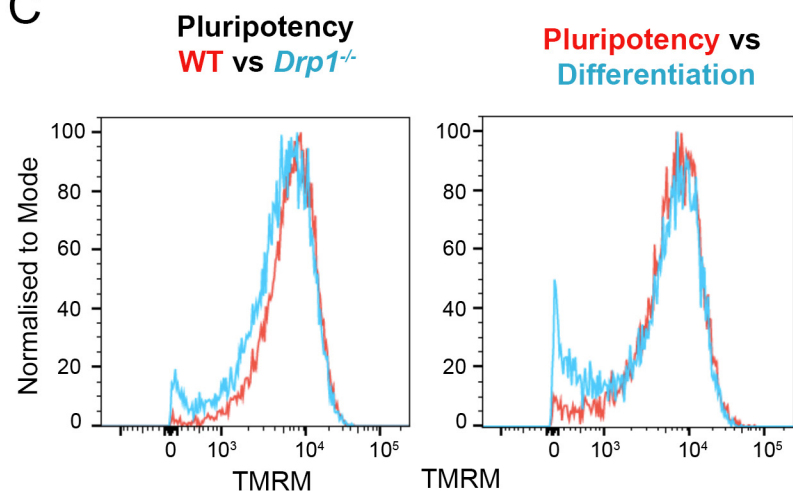**D**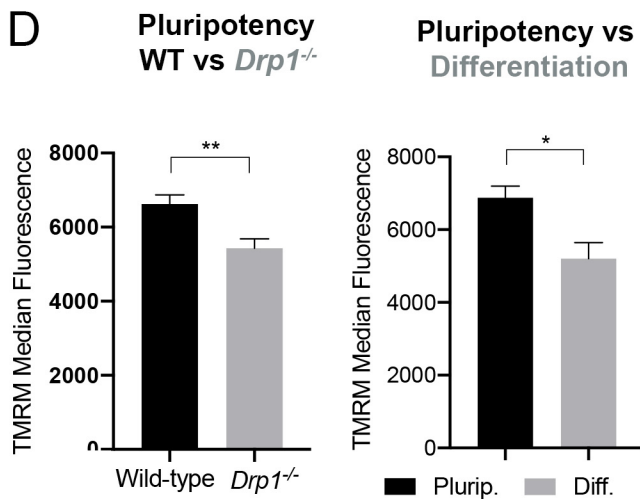**E**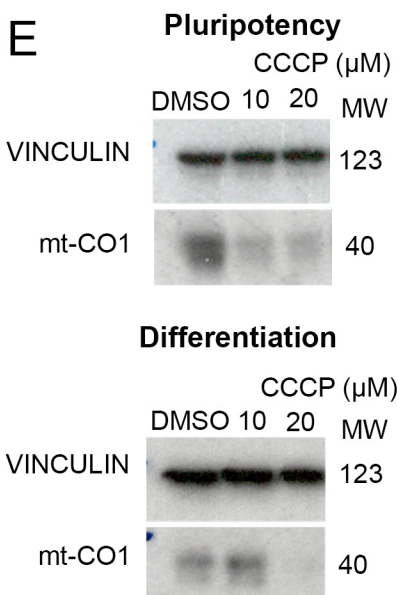**F**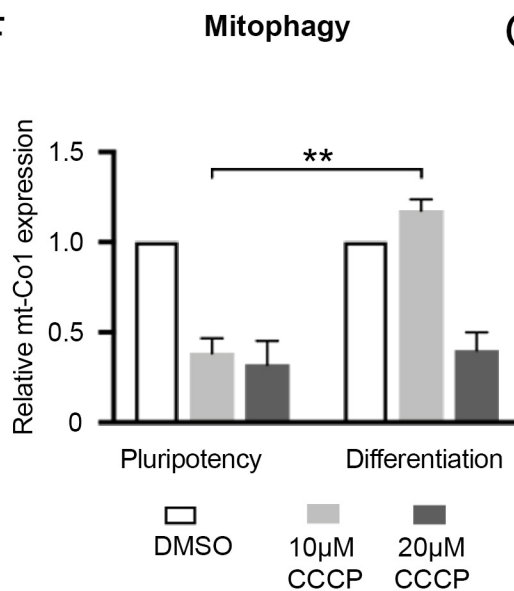**G**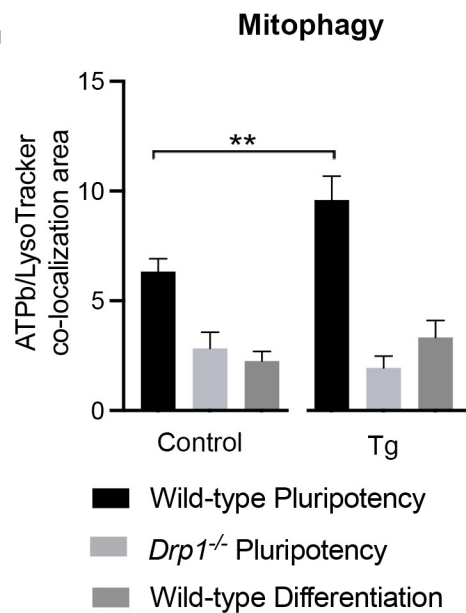

**Supplementary Figure 6. DRP1 regulates mitophagy in pluripotent stem cells.** Related to Figure 7. **A.** Immunostaining showing mitochondrial (TOMM20) and P62 co-localization in wild-type (WT) and *Drp1* mutant cells cultured pluripotency conditions and wild-type cells cultured in differentiation conditions. White arrows indicate mitochondrial aggregates. **B.** Quantification of co-localization area of P62 and TOMM20 from whole images taken from (A). **C.** Analysis of mitochondrial membrane potential measured by TMRM in wild-type and *Drp1* mutant cells cultured in pluripotency conditions and wild-type cells cultured in differentiation conditions. **D.** Quantification of the median fluorescence TMRM values from (C). **E.** Mitophagy assessment in wild-type cells grown in pluripotency or differentiating conditions, after 18h of CCCP treatments. **F.** Quantification of (E). Relative mt-CO1 expression upon mitophagy stimulus with CCCP, normalised to control conditions (DMSO-treated) and relative to the loading control. **G.** Quantification of co-localization area of lysotracker and ATPb from whole images taken from Figure 7A. Average of 3 independent experiments +/- SEM is shown. 2-way ANOVA with Šidák correction \*\* $p < 0.01$ , \*\*\* $p < 0.001$  or \*\*\*\* $p < 0.0001$ . The statistical comparisons are made to untreated cells. Where no significance is indicated it is because no statistically significant difference was observed. MW= Molecular weight.

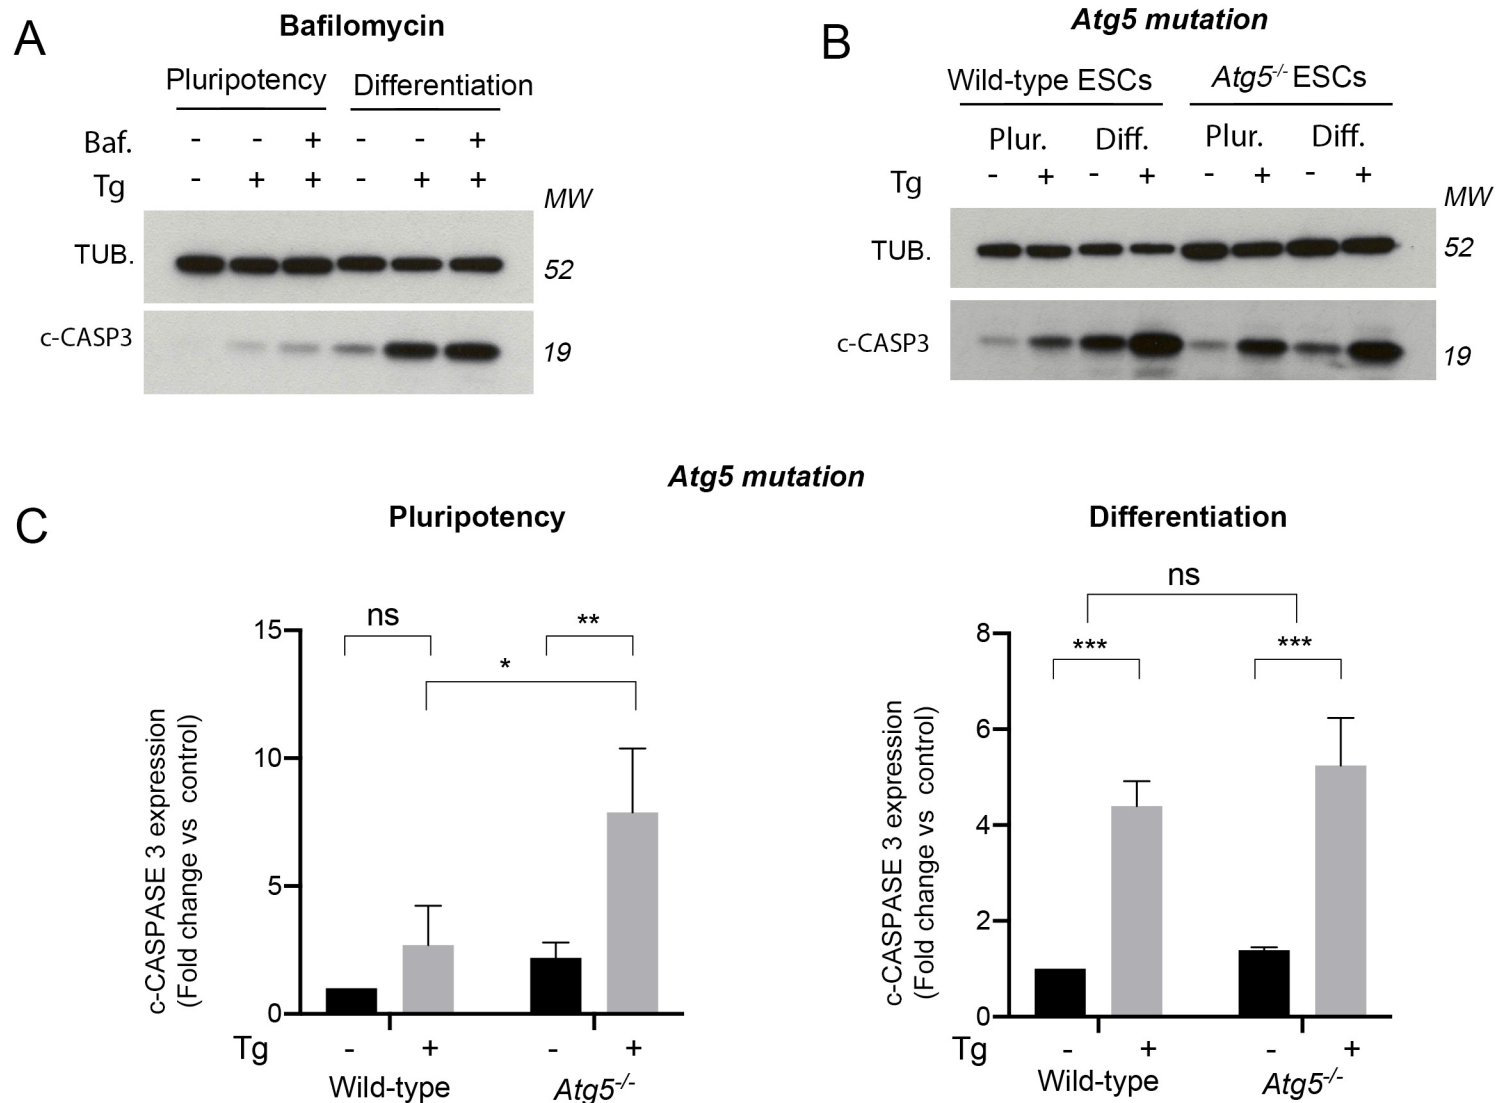

**Supplementary Figure 7. Inhibition of mitophagy promotes apoptosis in ESCs.** Related to Figure 7.

**A.** Cleaved-CASPASE 3 (c-CASP3) and  $\alpha$ -TUBULIN (TUB.) protein levels in wild-type ESCs cultured in pluripotency or differentiation conditions untreated or treated with 1 $\mu$ M thapsigargin (Tg) +/- 10nM bafilomycin (Baf.) for 5h. **B.** Cleaved-CASPASE 3 (c-CASP3) and  $\alpha$ -TUBULIN (TUB.) protein levels in wild-type and *Atg5*<sup>-/-</sup> ESCs cultured in pluripotency or differentiation conditions untreated or treated with 1 $\mu$ M thapsigargin (Tg) for 5h.

**C.** Quantification of (B). Protein levels are normalised against  $\alpha$ TUBULIN and the graph shows protein expression levels relative to wild-type cells. Average of 3 independent experiments +/- SEM is shown. Statistical comparisons are made relative to the control cells in the same culture condition. 2-way ANOVA with Šidák correction \* $p < 0.05$ , \*\* $p < 0.01$  or \*\*\* $p < 0.001$ . MW= Molecular weight.
